# Supplementary material for: Quantitative Analysis of Molecular Mobility in Amorphous Lactose Above Tg: A Novel Insight from Molecular Dynamic Simulation to Strength Parameter
Source: MDPI journal article supplement (doi:10.3390/foods14060928), 2025-03-08
Supplement: s1 [file s1]

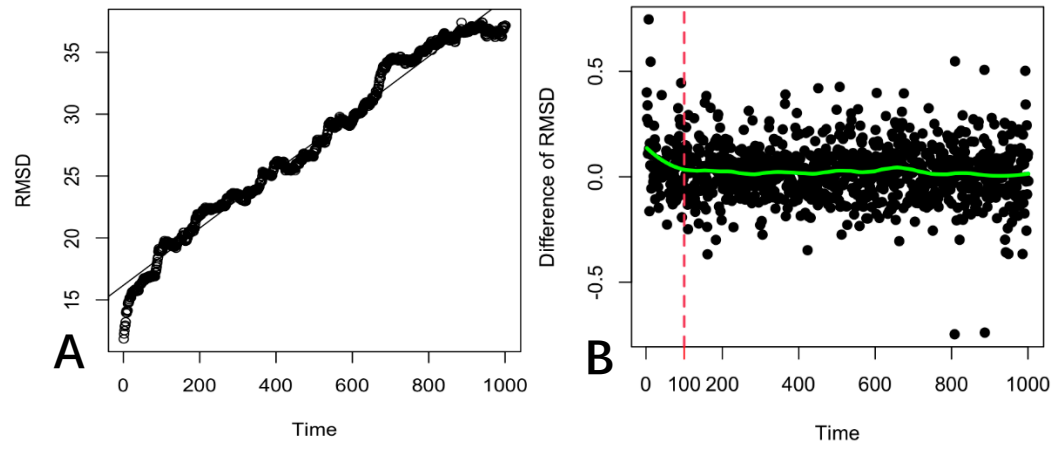

**Figure S1.** The changes (A) and differences (B) of *RMSD* in simulant lactose/water cells (100 molecules at mimic  $a_w$  0.11 and  $T-T_g=10$ k) up to 1000 ps.

**Table S1.** The calculated free volume data for simulant lactose/water cells with 100 molecules from 0 to 100 *ps* under various mimic  $a_w$  (0.11 to 0.44) and temperatures.

| Water Activities<br>( $a_w$ ) | Molecular Ratios<br>(Lactose/Water) | Temperature<br>(K) | Time<br>(ps) | Free volume<br>(Angstrom <sup>3</sup> ) | Percentage<br>(%) |
|-------------------------------|-------------------------------------|--------------------|--------------|-----------------------------------------|-------------------|
| 0.11                          | 68:32                               | 338k               | 0            | 32200.939                               | 40.65             |
|                               |                                     |                    | 20           | 42319.684                               | 53.42             |
|                               |                                     |                    | 40           | 43945.886                               | 55.48             |
|                               |                                     |                    | 60           | 43847.836                               | 55.35             |
|                               |                                     |                    | 80           | 44161.901                               | 55.75             |
|                               |                                     |                    | 100          | 44176.873                               | 55.77             |
|                               |                                     | 343k               | 0            | 32067.512                               | 40.48             |
|                               |                                     |                    | 20           | 40690.392                               | 51.37             |
|                               |                                     |                    | 40           | 41711.563                               | 52.66             |
|                               |                                     |                    | 60           | 42133.913                               | 53.19             |
|                               |                                     |                    | 80           | 42424.626                               | 53.56             |
|                               |                                     |                    | 100          | 42512.679                               | 53.67             |
|                               |                                     | 348k               | 0            | 32067.512                               | 40.48             |
|                               |                                     |                    | 20           | 41528.707                               | 52.42             |
|                               |                                     |                    | 40           | 43776.512                               | 55.26             |
|                               |                                     |                    | 60           | 44143.936                               | 55.73             |
|                               |                                     |                    | 80           | 44449.889                               | 56.11             |
|                               |                                     |                    | 100          | 44364.481                               | 56.00             |
|                               |                                     | 353k               | 0            | 32067.512                               | 40.48             |
|                               |                                     |                    | 20           | 41318.997                               | 52.16             |
|                               |                                     |                    | 40           | 42723.704                               | 53.93             |
|                               |                                     |                    | 60           | 42482.800                               | 53.63             |
|                               |                                     |                    | 80           | 43229.021                               | 54.57             |
|                               |                                     |                    | 100          | 43200.711                               | 54.53             |
|                               |                                     | 358k               | 0            | 32067.512                               | 40.48             |
|                               |                                     |                    | 20           | 40812.000                               | 51.52             |
|                               |                                     |                    | 40           | 43271.290                               | 54.62             |
|                               |                                     |                    | 60           | 43329.242                               | 54.70             |
|                               |                                     |                    | 80           | 43623.773                               | 55.07             |
|                               |                                     |                    | 100          | 44188.707                               | 55.78             |
|                               |                                     | 363k               | 0            | 32067.512                               | 40.48             |
|                               |                                     |                    | 20           | 42602.792                               | 53.78             |
|                               |                                     |                    | 40           | 42601.050                               | 53.78             |
|                               |                                     |                    | 60           | 43137.546                               | 54.46             |
|                               |                                     |                    | 80           | 43714.282                               | 55.18             |
|                               |                                     |                    | 100          | 43810.099                               | 55.30             |
|                               |                                     | 368k               | 0            | 32067.512                               | 40.48             |

|      |       |      |     |           |       |
|------|-------|------|-----|-----------|-------|
| 0.22 | 57:43 |      | 20  | 42010.641 | 53.03 |
|      |       |      | 40  | 43365.760 | 54.74 |
|      |       |      | 60  | 44414.465 | 56.07 |
|      |       |      | 80  | 44646.433 | 56.36 |
|      |       |      | 100 | 44653.483 | 56.37 |
|      |       |      | 0   | 27575.943 | 40.93 |
|      |       | 313k | 20  | 33886.857 | 50.30 |
|      |       |      | 40  | 35623.696 | 52.88 |
|      |       |      | 60  | 36203.947 | 53.74 |
|      |       |      | 80  | 36346.324 | 53.94 |
|      |       |      | 100 | 36417.298 | 54.06 |
|      |       |      | 0   | 27575.943 | 40.93 |
|      |       | 318k | 20  | 35675.228 | 52.95 |
|      |       |      | 40  | 36609.891 | 54.34 |
|      |       |      | 60  | 36624.597 | 54.36 |
|      |       |      | 80  | 37154.124 | 55.15 |
|      |       |      | 100 | 37026.643 | 54.96 |
|      |       |      | 0   | 27575.943 | 40.93 |
|      |       | 323k | 20  | 35110.157 | 52.12 |
|      |       |      | 40  | 36123.814 | 53.62 |
|      |       |      | 60  | 36375.576 | 53.99 |
|      |       |      | 80  | 36312.651 | 53.90 |
|      |       |      | 100 | 36336.005 | 53.98 |
|      |       |      | 0   | 27575.943 | 40.93 |
|      |       | 328k | 20  | 34436.209 | 51.12 |
|      |       |      | 40  | 35050.560 | 52.03 |
|      |       |      | 60  | 35121.123 | 52.13 |
|      |       |      | 80  | 35849.407 | 53.21 |
|      |       |      | 100 | 36163.904 | 53.68 |
|      |       |      | 0   | 27575.943 | 40.93 |
|      |       | 333k | 20  | 34992.405 | 51.94 |
|      |       |      | 40  | 36607.752 | 54.34 |
|      |       |      | 60  | 36865.774 | 54.72 |
|      |       |      | 80  | 36861.210 | 54.71 |
|      |       |      | 100 | 37323.439 | 55.40 |
|      |       |      | 0   | 27575.943 | 40.93 |
|      |       | 338k | 20  | 35883.461 | 53.26 |
|      |       |      | 40  | 36300.133 | 53.88 |
|      |       |      | 60  | 36410.786 | 54.05 |
|      |       |      | 80  | 36589.038 | 54.31 |
|      |       |      | 100 | 36591.542 | 54.31 |
|      |       |      | 0   | 27575.943 | 40.93 |
|      |       | 343k | 20  | 35689.584 | 52.98 |
|      |       |      | 40  | 36260.153 | 53.82 |

|      |       |     |           |           |           |       |
|------|-------|-----|-----------|-----------|-----------|-------|
| 0.33 | 52:48 |     | 60        | 36725.948 | 54.51     |       |
|      |       |     | 80        | 36708.565 | 54.49     |       |
|      |       |     | 100       | 36637.622 | 54.38     |       |
|      |       |     |           |           |           |       |
|      |       |     |           | 0         | 25547.001 | 41.21 |
|      |       |     |           | 20        | 31309.400 | 50.51 |
|      |       |     | 303k      | 40        | 32544.007 | 52.50 |
|      |       |     |           | 60        | 32877.725 | 53.04 |
|      |       |     |           | 80        | 33132.575 | 53.45 |
|      |       |     |           | 100       | 33234.957 | 53.62 |
|      |       |     |           |           |           |       |
|      |       |     |           | 0         | 25547.001 | 41.21 |
|      |       |     |           | 20        | 32075.247 | 51.75 |
|      |       |     | 308k      | 40        | 32875.755 | 53.04 |
|      |       |     |           | 60        | 33057.438 | 53.33 |
|      |       |     |           | 80        | 33345.236 | 53.80 |
|      |       |     |           | 100       | 33589.514 | 54.19 |
|      |       |     |           |           |           |       |
|      |       |     |           | 0         | 25547.001 | 41.21 |
|      |       |     |           | 20        | 32613.698 | 52.62 |
|      |       |     | 313k      | 40        | 33510.966 | 54.06 |
|      |       |     |           | 60        | 33607.165 | 54.22 |
|      |       |     |           | 80        | 33803.168 | 54.53 |
|      |       |     |           | 100       | 33937.488 | 54.75 |
|      |       |     |           |           |           |       |
|      |       |     |           | 0         | 25547.001 | 41.21 |
|      |       |     |           | 20        | 31712.665 | 51.16 |
|      |       |     | 318k      | 40        | 33233.580 | 53.62 |
|      |       |     |           | 60        | 33278.924 | 53.69 |
|      |       |     |           | 80        | 33466.742 | 53.99 |
|      |       |     |           | 100       | 33354     | 53.81 |
|      |       |     |           |           |           |       |
|      |       |     |           | 0         | 25547.001 | 41.21 |
|      |       |     |           | 20        | 31759.772 | 51.24 |
|      |       |     | 323k      | 40        | 33041.261 | 53.31 |
|      |       |     |           | 60        | 33212.597 | 53.58 |
|      |       |     |           | 80        | 33354.846 | 53.81 |
|      |       |     |           | 100       | 33362.598 | 53.82 |
|      |       |     |           |           |           |       |
|      |       |     |           | 0         | 25547.001 | 41.21 |
|      |       |     |           | 20        | 31583.471 | 50.95 |
|      |       |     | 328k      | 40        | 32723.784 | 52.79 |
|      |       |     |           | 60        | 33176.670 | 53.52 |
|      |       |     |           | 80        | 33222.576 | 53.60 |
|      |       | 100 | 33405.717 | 53.89     |           |       |
|      |       |     |           |           |           |       |
|      |       | 0   | 25547.001 | 41.21     |           |       |
|      |       | 20  | 32519.532 | 52.46     |           |       |
|      | 333k  | 40  | 33041.117 | 53.31     |           |       |
|      |       | 60  | 33010.300 | 53.26     |           |       |
|      |       | 80  | 33507.314 | 54.06     |           |       |

|      |       |       |     |           |       |
|------|-------|-------|-----|-----------|-------|
| 0.44 | 38:62 | 286 k | 100 | 33265.822 | 53.67 |
|      |       |       | 0   | 18752.591 | 39.98 |
|      |       |       | 20  | 24228.779 | 51.65 |
|      |       |       | 40  | 24715.644 | 52.69 |
|      |       |       | 60  | 25031.847 | 53.36 |
|      |       |       | 80  | 25138.713 | 53.59 |
|      |       |       | 100 | 24856.389 | 52.99 |
|      |       | 291   | 0   | 18752.591 | 39.98 |
|      |       |       | 20  | 24263.621 | 51.73 |
|      |       |       | 40  | 24474.417 | 52.18 |
|      |       |       | 60  | 24376.214 | 51.97 |
|      |       |       | 80  | 24837.428 | 52.95 |
|      |       |       | 100 | 25071.148 | 53.45 |
|      |       | 296   | 0   | 18752.591 | 39.98 |
|      |       |       | 20  | 23792.236 | 50.72 |
|      |       |       | 40  | 24395.399 | 52.01 |
|      |       |       | 60  | 24678.300 | 52.61 |
|      |       |       | 80  | 24904.801 | 53.09 |
|      |       |       | 100 | 25020.057 | 53.34 |
|      |       | 301   | 0   | 18752.591 | 39.98 |
|      |       |       | 20  | 24284.105 | 51.77 |
|      |       |       | 40  | 25022.415 | 53.34 |
|      |       |       | 60  | 25260.337 | 53.85 |
|      |       |       | 80  | 25704.869 | 54.80 |
|      |       |       | 100 | 25554.724 | 54.48 |
|      |       | 306   | 0   | 18752.591 | 39.98 |
|      |       |       | 20  | 24456.596 | 52.14 |
|      |       |       | 40  | 25128.928 | 53.57 |
|      |       |       | 60  | 25098.129 | 53.51 |
|      |       |       | 80  | 24943.412 | 53.18 |
|      |       |       | 100 | 25199.910 | 53.72 |
|      |       | 311   | 0   | 18752.591 | 39.98 |
|      |       |       | 20  | 23873.709 | 50.90 |
|      |       |       | 40  | 24432.277 | 52.09 |
|      |       |       | 60  | 24633.096 | 52.51 |
|      |       |       | 80  | 24816.944 | 52.91 |
|      |       |       | 100 | 25112.534 | 53.54 |
|      |       | 316   | 0   | 18752.591 | 39.98 |
|      |       |       | 20  | 24338.806 | 51.89 |
|      |       |       | 40  | 24546.490 | 52.33 |
|      |       |       | 60  | 25279.137 | 53.89 |
|      |       |       | 80  | 25579.540 | 54.53 |
|      |       |       | 100 | 25474.984 | 54.31 |
